# Supplementary material for: CD73 restrains mutant β-catenin oncogenic activity in endometrial carcinomas
Source: PubMed Central journal article supplement (PMC11601622; doi:10.1101/2024.11.18.624183), 2024-11-18
Supplement: media-1.pdf [file media-1.pdf]

1 **Supplemental Material**

2 Supplemental Table 1

3 Clinicopathological features of qRT-PCR cohort of exon 3 *CTNNB1*-mutant endometrial  
4 carcinomas.

| <b>Characteristics (n = 29)</b>      | <b>No Recurrence</b> | <b>Recurrence</b> |
|--------------------------------------|----------------------|-------------------|
| Histology                            | <b>n =</b>           | <b>n =</b>        |
| Endometrioid                         | 17                   | 10                |
| Non-endometrioid                     | 2                    | 0                 |
|                                      |                      |                   |
| FIGO Stage                           | <b>n =</b>           | <b>n =</b>        |
| I                                    | 14                   | 7                 |
| II                                   | 1                    | 0                 |
| III                                  | 3                    | 2                 |
| IV                                   | 0                    | 1                 |
| Unknown                              | 1                    |                   |
|                                      |                      |                   |
| Grade                                | <b>n =</b>           | <b>n =</b>        |
| G1                                   | 3                    | 1                 |
| G2                                   | 14                   | 7                 |
| G3                                   | 2                    | 2                 |
|                                      |                      |                   |
| Lymphovascular Space Invasion (LVSI) | <b>n =</b>           | <b>n =</b>        |
| Yes                                  | 5                    | 5                 |
| No                                   | 14                   | 3                 |
| Unknown                              |                      | 2                 |

5

6

## 7 Supplemental Table 2

## 8 Antibodies

| <b>Antibody</b>                     | <b>Source</b>     | <b>Company</b> | <b>Catalog #/Clone</b> |
|-------------------------------------|-------------------|----------------|------------------------|
| Alexa Fluor 594 goat anti-mouse IgG |                   | Invitrogen     | #A21206                |
| Alexa Fluor 594 goat anti-mouse IgG |                   | Invitrogen     | #A11032                |
| $\beta$ -catenin                    | Rabbit polyclonal | Cell Signaling | #8480/D10AB            |
| CD73                                | Rabbit            | Cell Signaling | # 13160/D7F9A          |
| E-cadherin                          | Mouse monoclonal  | BD Biosciences | #36/E-Cadherin         |
| GAPDH                               | Rabbit polyclonal | Cell Signaling | # 3683/14C10           |
| HRP-conjugated anti-mouse IgG       |                   | Cell Signaling | #7076                  |
| HRP-conjugated anti-rabbit IgG      |                   | Cell Signaling | #7074                  |
| Myc-tag (WB)                        | Rabbit polyclonal | Cell Signaling | #2278/ 71D10           |
| Myc-tag (IF)                        | Mouse monoclonal  | Cell Signaling | #2276/9B11             |
| SP 1                                | Rabbit polyclonal | Cell Signaling | #9389/D4C3             |
| Rab11a                              | Rabbit polyclonal | ABClonal       | #A3251                 |
| H2AX                                | Rabbit polyclonal | Cell Signaling | #7631/D17A3            |
| GSK3 $\beta$                        | Rabbit monoclonal | Cell Signaling | #9312/27C10            |
| pGSK3 $\beta$ S9                    | Rabbit polyclonal | Cell Signaling | #9323S/5B3             |
| $\alpha$ -catenin                   | Rabbit monoclonal | Cell Signaling | #3240/23B2             |
| GAPDH-HRP                           | Rabbit monoclonal | Cell Signaling | #3683S/14c10           |
| SOX17                               | Rabbit polyclonal | ABclonal       | #A18858                |
| FOSL1                               | Rabbit polyclonal | ABclonal       | #A5372                 |

9

10

11

12 Supplemental Table 3

13  $\beta$ -catenin target genes, downregulated in HEC-1-A *NT5E* KO cells

| <b>Gene</b>    | <b>p-value, KO vs WT</b> |
|----------------|--------------------------|
| <i>GINS3</i>   | 0.016997                 |
| <i>SOX9</i>    | 0.324417                 |
| <i>UHRF1</i>   | 0.043521                 |
| <i>FOXRED2</i> | 0.056074                 |
| <i>ABCC4</i>   | 0.025321                 |
| <i>SCARA3</i>  | 0.037061                 |
| <i>CCL28</i>   | 0.00272                  |
| <i>DKK1</i>    | 0.011321                 |
| <i>MNS1</i>    | 0.002993                 |
| <i>GINS2</i>   | 0.05342                  |
| <i>SLC7A2</i>  | 0.015135                 |
| <i>CLDN2</i>   | 0.01134                  |
| <i>SOX17</i>   | 0.000201                 |
| <i>MCM2</i>    | 0.001181                 |
| <i>ID2</i>     | 0.000775                 |
| <i>CCND1</i>   | 0.002666                 |
| <i>FAM111B</i> | 0.000191                 |
| <i>RNF43</i>   | 0.008008                 |
| <i>ALDH1A1</i> | 0.000622                 |
| <i>MMP7</i>    | 0.006969                 |

|              |          |
|--------------|----------|
| <i>HDAC4</i> | 0.001222 |
| <i>EPHB3</i> | 0.002521 |
| <i>FZD7</i>  | 0.000145 |

14

15

16

17

18

19

20

21

22

23

24

25

26

27

28

29

30

31

32

33

34 Supplemental Table 4

35  $\beta$ -catenin target genes, upregulated in HEC-1-A *NT5E* KO cells

| <b>Gene</b>     | <b>p-value, KO vs WT</b> |
|-----------------|--------------------------|
| <i>ZNF367</i>   | 0.147299                 |
| <i>LGR5</i>     | 0.101663                 |
| <i>GJA1</i>     | 0.24209                  |
| <i>LOXL3</i>    | 0.035689                 |
| <i>PDK1</i>     | 0.02015                  |
| <i>CD3EAP</i>   | 0.030654                 |
| <i>PPARD</i>    | 0.226127                 |
| <i>NOS2</i>     | 0.283438                 |
| <i>SNAI1</i>    | 0.016422                 |
| <i>GBX2</i>     | 0.040869                 |
| <i>CD274</i>    | 0.010798                 |
| <i>TEAD4</i>    | 0.063674                 |
| <i>JUN</i>      | 0.000082                 |
| <i>PLAUR</i>    | 0.005815                 |
| <i>FOSL1</i>    | 0.01345                  |
| <i>DTL</i>      | 0.005541                 |
| <i>TFAP4</i>    | 0.000273                 |
| <i>FAM216A</i>  | 0.000051                 |
| <i>VEGFA</i>    | 0.009235                 |
| <i>CLDN1</i>    | 0.001855                 |
| <i>ANKRD13B</i> | 0.015263                 |
| <i>GRAMD1A</i>  | 0.002139                 |
| <i>MYC</i>      | 0.035353                 |
| <i>JAG1</i>     | 0.003937                 |
| <i>CDT1</i>     | 0.001499                 |
| <i>FN1</i>      | 0.100296                 |
| <i>PALD1</i>    | 0.018427                 |
| <i>BAMBI</i>    | 0.001473                 |
| <i>NES</i>      | 0.03024                  |
| <i>STRA6</i>    | 0.057879                 |
| <i>TIAM1</i>    | 0.061368                 |

36

37

38

39

## 40 Supplemental Table 5

41 TCF-dependent Wnt target genes<sup>1</sup>, downregulated in HEC-1-A *NT5E* KO cells

| <b>Gene</b>      | <b>p-value, KO vs WT</b> |
|------------------|--------------------------|
| <i>TPI1P2</i>    | 0.135108                 |
| <i>NMNAT3</i>    | 0.290828                 |
| <i>PYGM</i>      | 0.236633                 |
| <i>MSX2</i>      | 0.018796                 |
| <i>SLC7A8</i>    | 0.064381                 |
| <i>HIST1H2BN</i> | 0.427417                 |
| <i>BAG1</i>      | 0.179839                 |
| <i>HIST1H2AC</i> | 0.070826                 |
| <i>HBP1</i>      | 0.029965                 |
| <i>CACNA1D</i>   | 0.006801                 |
| <i>BCL11B</i>    | 0.021994                 |
| <i>COL7A1</i>    | 0.027357                 |
| <i>TSHZ1</i>     | 0.020746                 |
| <i>THRB</i>      | 0.00252                  |
| <i>PAX2</i>      | 0.011465                 |
| <i>NEDD9</i>     | 0.001869                 |
| <i>B3GNT3</i>    | 0.000015                 |
| <i>CCND1</i>     | 0.002666                 |
| <i>DKK1</i>      | 0.011321                 |
| <i>CCDC87</i>    | 0.028848                 |
| <i>ELMO3</i>     | 0.736051                 |
| <i>LRIT3</i>     | 0.649253                 |
| <i>FERMT3</i>    | 0.022604                 |
| <i>SNAI3</i>     | 0.008167                 |

## 43 Supplemental Table 6

44 TCF-dependent Wnt target genes<sup>1</sup>, upregulated in HEC-1-A *NT5E* KO cells

| <b>Gene</b>      | <b>p-value, KO vs WT</b> |
|------------------|--------------------------|
| <i>GPR83</i>     | 0.993146                 |
| <i>UNC5C</i>     | 0.186194                 |
| <i>CYP2D7</i>    | 0.780491                 |
| <i>MYOM2</i>     | 0.241658                 |
| <i>EYA1</i>      | 0.027181                 |
| <i>CCNG2</i>     | 0.024325                 |
| <i>ZFAND2A</i>   | 0.162111                 |
| <i>PIP5KL1</i>   | 0.079339                 |
| <i>ANKRD24</i>   | 0.020076                 |
| <i>MSX1</i>      | 0.014937                 |
| <i>ANKRA2</i>    | 0.000756                 |
| <i>SYTL5</i>     | 0.189944                 |
| <i>HRH1</i>      | 0.026711                 |
| <i>THSD7A</i>    | 0.405609                 |
| <i>CCBE1</i>     | 0.937148                 |
| <i>KLLN</i>      | 0.019551                 |
| <i>PRPH</i>      | 0.044281                 |
| <i>GRM4</i>      | 0.012582                 |
| <i>MATN1-AS1</i> | 0.029069                 |
| <i>HOXA9</i>     | 0.130986                 |
| <i>C1QL1</i>     | 0.00512                  |
| <i>JAK3</i>      | 0.005432                 |
| <i>TLL1</i>      | 0.001282                 |
| <i>RGS4</i>      | 0.029391                 |
| <i>SLC7A5P1</i>  | 0.021268                 |
| <i>INSC</i>      | 0.000029                 |
| <i>PLXNA2</i>    | 0.03917                  |
| <i>DDX60</i>     | 0.114797                 |
| <i>ADGRA2</i>    | 0.090646                 |
| <i>DOCK11</i>    | 0.004414                 |
| <i>PLAT</i>      | 0.028507                 |
| <i>RASSF6</i>    | 0.008413                 |
| <i>SYTL2</i>     | 0.002717                 |
| <i>CREBRF</i>    | 0.008829                 |
| <i>RASGEF1B</i>  | 0.00022                  |
| <i>NAP1L3</i>    | 0.014844                 |
| <i>SLC9A9</i>    | 0.001679                 |
| <i>TEX19</i>     | 0.019683                 |

|                  |          |
|------------------|----------|
| <i>RNF19B</i>    | 0.007087 |
| <i>CLDN1</i>     | 0.001855 |
| <i>ADAMTS5</i>   | 0.005591 |
| <i>CALCB</i>     | 0.012077 |
| <i>NTMT1</i>     | 0.143381 |
| <i>ZNF503</i>    | 0.000269 |
| <i>RPL41</i>     | 0.152306 |
| <i>SOCS2-AS1</i> | 0.045362 |
| <i>SCUBE1</i>    | 0.126216 |

45

46

47

48

49

50

51

52

53

54

55

56

57

58

59

60

61

62

63



## 64 Supplemental Table 7

65 Novogene-defined differentially expressed genes with D32N, G34R, and S37F in *NT5E*66 KO cells vs. EV *NT5E* WT cells.

| Gene              | Description    | Mutant(s)            | $\Delta$ , KO vs WT | Involvement in cancer                                                                                                      | References |
|-------------------|----------------|----------------------|---------------------|----------------------------------------------------------------------------------------------------------------------------|------------|
| <i>LINC01389</i>  | Antisense      | S37F                 | down                | upregulation is associated with gastric cancer; correlated with EMT                                                        | 2          |
| <i>AC008438.1</i> | Antisense      | S37F                 | down                | upregulation in some cancers                                                                                               | 3          |
| <i>AL080317.1</i> | Antisense      | S37F<br>G34R         | down                | upregulated in colon cancer; HR > 1 for Wilms tumor                                                                        | 4,5        |
| <i>AC092119.2</i> | lincRNA        | S37F<br>D32N         | down                | upregulated in gastric cancer, ccRCC                                                                                       | 6          |
| <i>LINC00113</i>  | lincRNA        | S37F<br>D32N         | down                | upregulated in TNBC, correlating with poor prognosis; up in lung cancer; downregulated in esophageal cancer; down in ccRCC | 7–10       |
| <i>MIR3613</i>    | miRNA          | S37F                 | down                | down in CRC; tumor suppressor in breast cancer;                                                                            | 11,12      |
| <i>TUBA1A</i>     | protein_coding | S37F<br>G34R         | down                | up in GC; up in GBM                                                                                                        | 13,14      |
| <i>HSPA1A</i>     | protein_coding | S37F<br>G34R<br>D32N | down                | up in breast cancer; CRC                                                                                                   | 15,16      |
| <i>U2AF1</i>      | protein_coding | S37F<br>D32N         | down                | Mixed/Unknown                                                                                                              | 17,18      |
| <i>ZNF112</i>     | protein_coding | S37F                 | down                | Unknown                                                                                                                    |            |
| <i>AP001107.4</i> | Antisense      | G34R                 | down                | down in CRC;                                                                                                               | 19,20      |
| <i>AC010331.1</i> | Antisense      | G34R                 | down                | favorable prognostic factor in bladder cancer + breast cancer                                                              | 21,22      |
| <i>U62317.2</i>   | Antisense      | G34R<br>D32N         | down                | down in bladder cancer; high levels correlate with high OS in basal-like breast cancer;                                    | 23,24      |
| <i>USP46-AS1</i>  | lincRNA        | G34R                 | down                | increased OS in ccRCC and glioma; decreased in HCC                                                                         | 25,26      |

|                   |                |              |      |                                                                                                                                               |       |
|-------------------|----------------|--------------|------|-----------------------------------------------------------------------------------------------------------------------------------------------|-------|
| <i>AC127024.5</i> | lincRNA        | G34R         | down | HR 0.3 in pancreatic cancer                                                                                                                   | 27,28 |
| <i>AC005392.2</i> | lincRNA        | G34R         | down | pro-angiogenic in CRC; poor OS in AML                                                                                                         | 29,30 |
| <i>AC124312.2</i> | lincRNA        | G34R         | down | risk factor for bladder cancer;                                                                                                               | 31    |
| <i>AC005332.3</i> | lincRNA        | G34R<br>D32N | down | HR 0.7 in pancreatic cancer; pro-EMT in HCC                                                                                                   | 32–34 |
| <i>MIR5587</i>    | miRNA          | G34R         | down | Unknown                                                                                                                                       |       |
| <i>MIR6783</i>    | miRNA          | G34R         | down | Mixed/Unknown                                                                                                                                 | 35    |
| <i>AC131235.3</i> | Antisense      | D32N         | down | shorter survival in CSC;                                                                                                                      | 36    |
| <i>FP236383.1</i> | lincRNA        | D32N         | down | Unknown                                                                                                                                       |       |
| <i>MIR641</i>     | miRNA          | D32N         | down | prohibited prolifer/met but promoted apoptosis in lung cancer; tumor suppressor in lung cancer and cervical cancer                            | 37,38 |
| <i>MIR3682</i>    | miRNA          | D32N         | down | migration and stemness in HCC, through PI3K/ $\beta$ -catenin;                                                                                | 39    |
| <i>MIR3939</i>    | miRNA          | D32N         | down | associated with RT sensitivity in cervical cancer; associated with response to sunitinib in ccRCC;                                            | 40,41 |
| <i>HIST2H2AA4</i> | protein_coding | D32N         | down | associated with T2DM + pancreatic cancer; associated with hypothermic response in breast cancer                                               | 42,43 |
| <i>HIST2H2AA3</i> | protein_coding | D32N         | down | down in HCC; associated with T2DM + pancreatic cancer; associated w/ hypothermic response in breast cancer; up in brain mets in breast cancer | 42–45 |
| <i>NUDT4B</i>     | protein_coding | D32N         | down | does not cause CRC cell prolifer; excluded from pan-cancer study due to similar expression in tumor vs normal tissue;                         | 46,47 |
| <i>U2AF1L5</i>    | protein_coding | D32N         | down | poor OS in NPC;                                                                                                                               | 48    |
| <i>F8A3</i>       | protein_coding | D32N         | down | lower OS in neuroblastoma;                                                                                                                    | 49    |
| <i>HIST3H2BB</i>  | protein_coding | D32N         | down | hypermethylated in lung cancer;                                                                                                               | 50    |
| <i>ETV7</i>       | protein_coding | D32N         | down | oncogene and intra-inflammatory in breast cancer; promotes CRC; doxorubicin resistance in breast cancer; poor OS in bladder cancer            | 51–54 |
| <i>VPREB3</i>     | protein_coding | D32N         | down | expressed on tumor cells with C-MYC translocations                                                                                            | 55    |

**Figure S1**

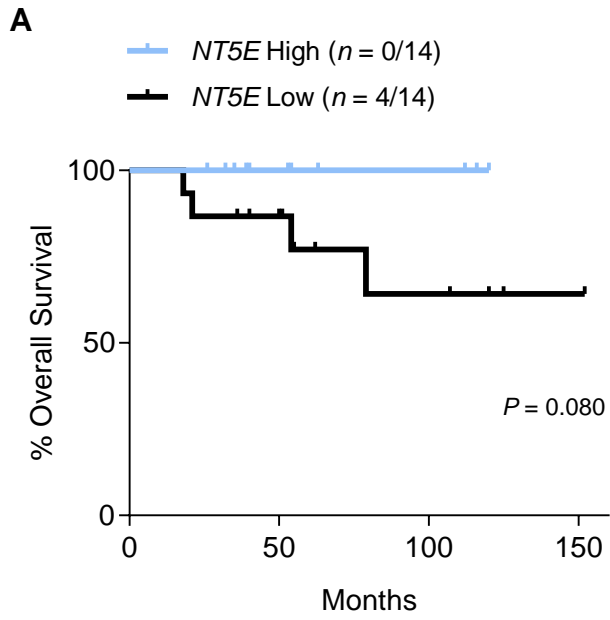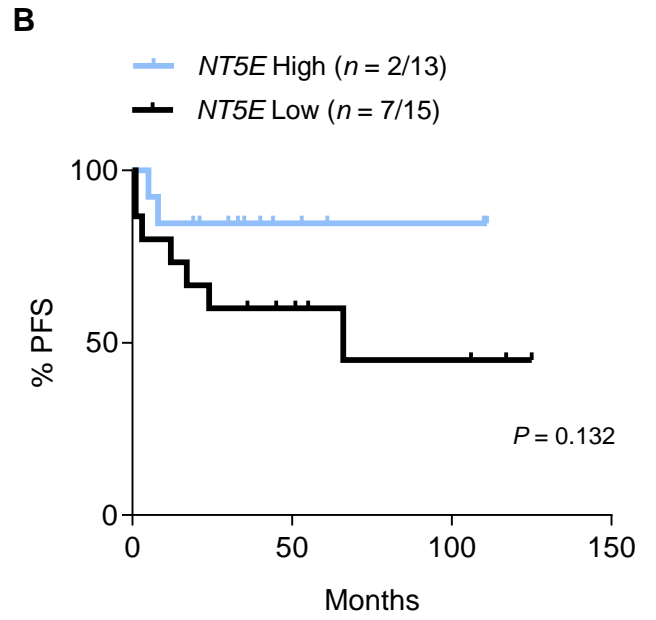

67 Supplemental Figure Legends

68 **Supplemental Figure 1. Survival trends for patients with *NT5E* high and low exon**  
69 **3 *CTNNB1* mutant tumors. (A)** Progression-free survival and **(B)** overall survival for  
70 patients with *NT5E* high and low endometrial tumors with exon 3 *CTNNB1* mutations.  
71 High and low values were determined by the median (0.001358). Logrank and Gehan-  
72 Breslow-Wilcoxon tests were used.  $n = 28$  patients for **(A)** and **(B)**, survival data was  
73 missing for one patient from the  $n = 29$  cohort.

74

75

76

77

78

79

80

81

82

83

84

85

**Figure S2**

**A**

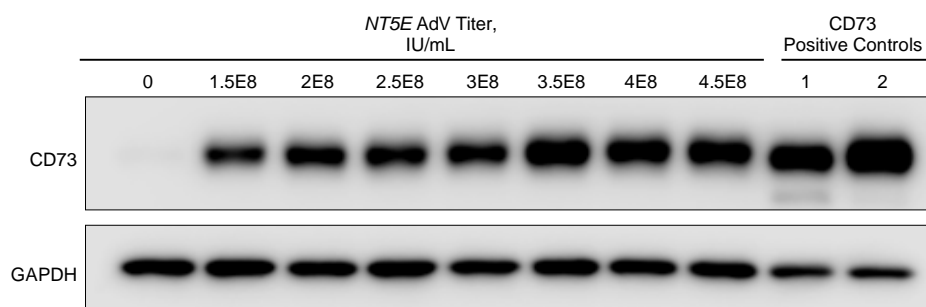

**B**

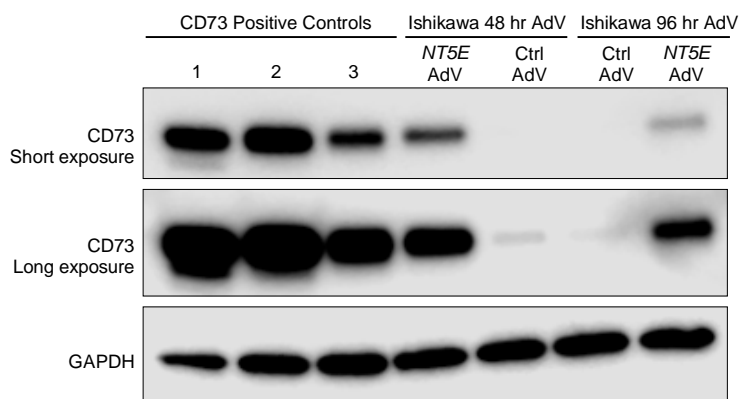

**C**

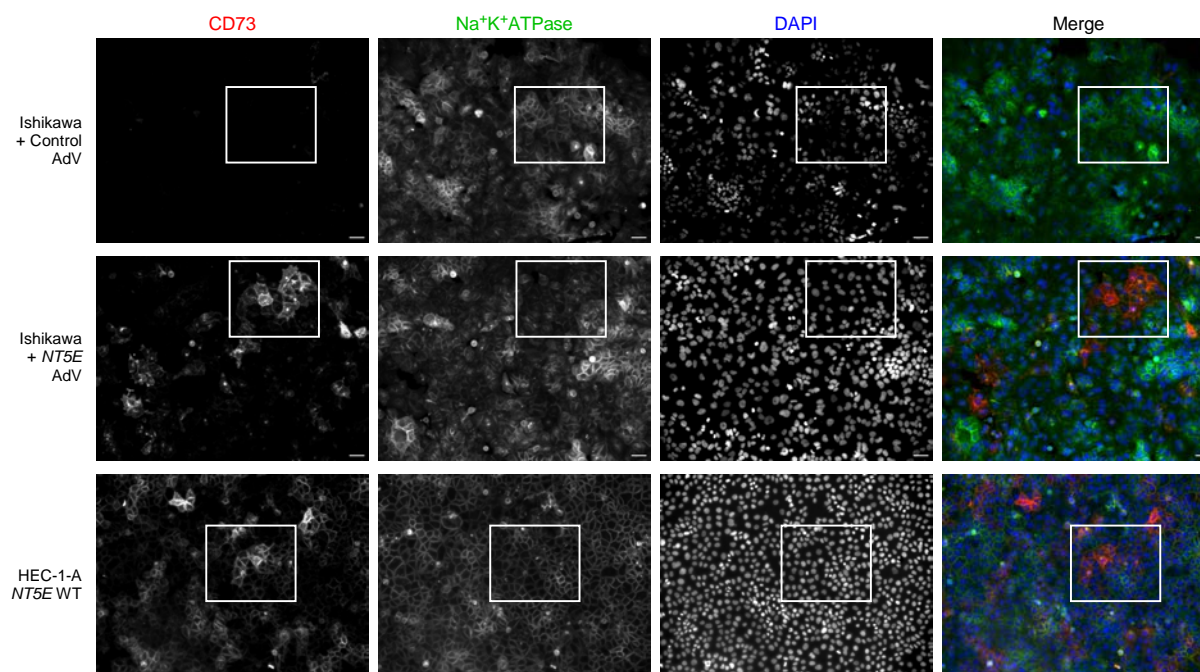

86 **Supplemental Figure 2. Induced expression of CD73 via *NT5E* adenovirus**  
87 **transduction in Ishikawa cells.** (A) CD73 protein expression with different *NT5E* AdV  
88 viral titers compared to HEC-1-A cells which serve as positive controls. CD73 Positive  
89 Control 1 = HEC-1-A cells at 100% confluency, 2 = HEC-1-A cells at 2 days post-  
90 confluency. (B) Validation of continued CD73 expression in Ishikawa cells. Expression  
91 persists for 96 hours, the endpoint in which TCF/LEF luciferase assays were performed.  
92 HEC-1-A cells serve as CD73 positive controls. Lanes 1 = HEC-1-A cells at 100%  
93 confluency; 2 = HEC-1-A cells at 2 days post-confluency; 3 = Ishikawa cells previously  
94 transduced with *NT5E* AdV and no luciferase reporter plasmids. NT = no transduction.  
95 (C) Uncropped immunofluorescence images corresponding to Fig. 2H. Cropped areas  
96 indicated with white rectangle. Scale bars 20  $\mu$ m.

97

98

99

100

101

102

103

104

105

106

**Figure S3**

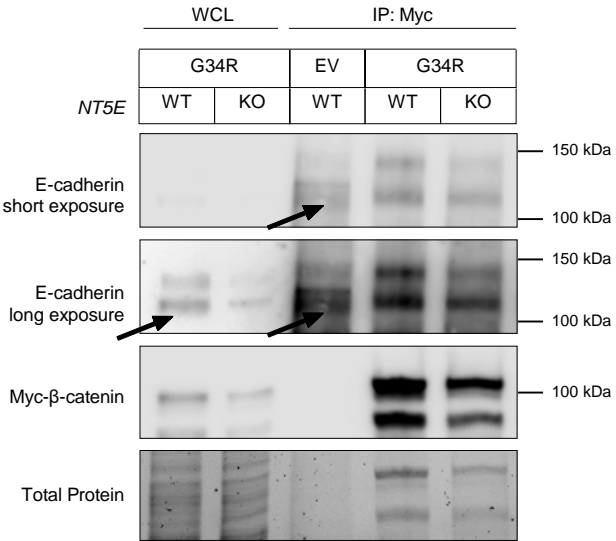

107 **Supplemental Figure 3. Patient-specific exon 3  $\beta$ -catenin mutant binds with E-**  
108 **cadherin.** Immunoblots from co-immunoprecipitation experiment in *NT5E* WT and  
109 *NT5E* KO HEC-1-A cells. Myc- $\beta$ -catenin was precipitated, and samples were probed for  
110 E-cadherin and myc- $\beta$ -catenin expression G34R. *NT5E* KO cells have decreased  
111 expression of E-cadherin compared to *NT5E* WT cells. Thus, *NT5E* KO cells have a  
112 reduced capacity for E-cadherin- $\beta$ -catenin binding. Accordingly, *NT5E* KO cells have  
113 weaker cell adhesions and increased nuclear  $\beta$ -catenin.

114

115

116

117

118

119

120

121

122

123

124

125



# Figure S4

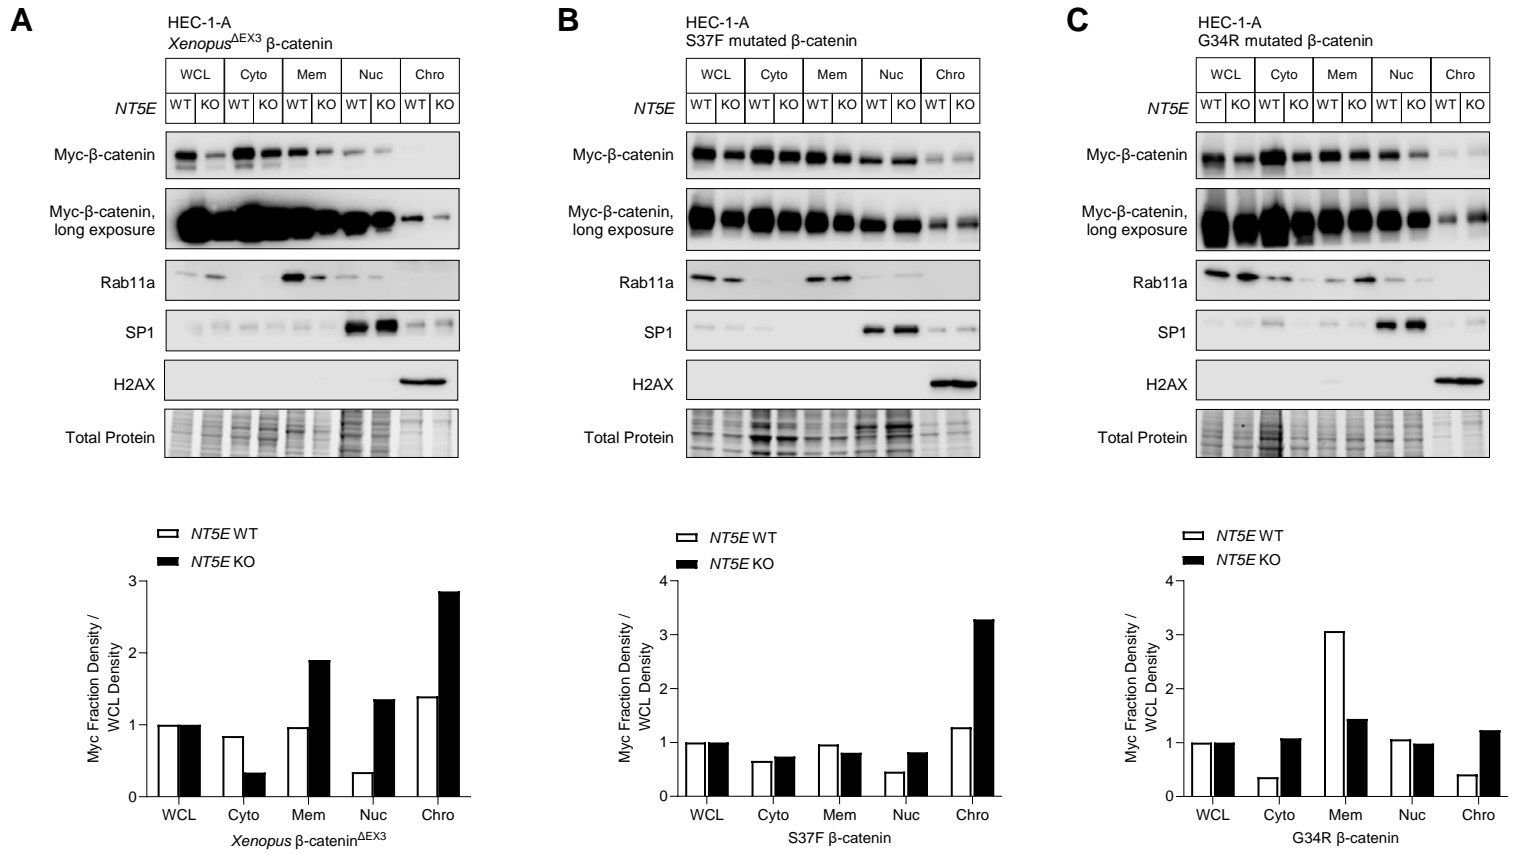

126 **Supplemental Figure 4. Independent replicates of cellular fractionations with**  
127 **patient-specific  $\beta$ -catenin mutations.** (A, B, C) Independent replicates of the cellular  
128 fractionation experiments described in Fig. 4D, 4E, and 4F from *NT5E* WT and *NT5E*  
129 KO HEC-1-A cells. *NT5E* WT and *NT5E* KO HEC-1-A cells were transfected with  
130 patient-specific  $\beta$ -catenin mutants (A) *Xenopus*  $\beta$ -catenin <sup>$\Delta$ EX3</sup>, (B) S37F, or (C) G34R.  
131 Densitometry graphs are shown for myc- $\beta$ -catenin mutant expression for each cellular  
132 fraction normalized to myc- $\beta$ -catenin mutant expression in the whole cell lysate (WCL).  
133 Cellular fraction markers: Rab11a (membrane), SP1 (nuclear), and H2AX (chromatin).

134

135

136

137

138

139

140

141

142

143

144

145

**Figure S5**

**A**

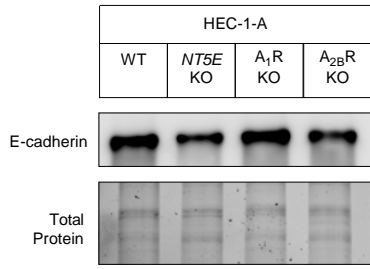

**B**

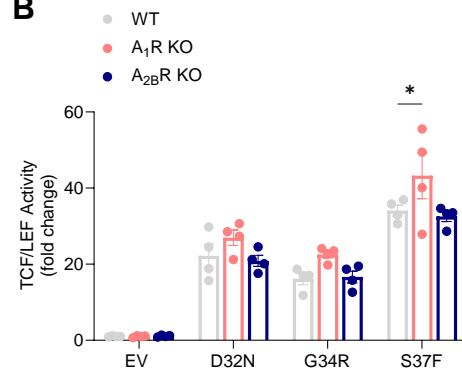

**C**

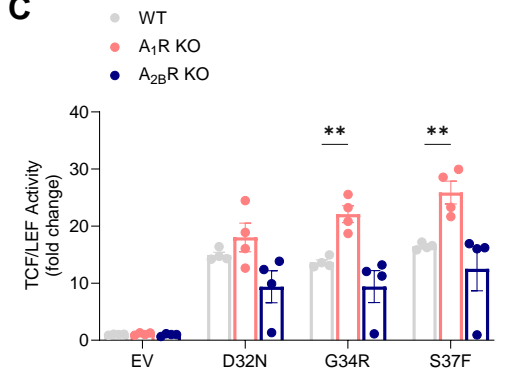

146 **Supplemental Figure 5. Reduced transcriptional activity of patient-specific  $\beta$ -**  
147 **catenin mutants in A<sub>1</sub>R KO cells. (A)** Immunoblot showing E-cadherin expression is  
148 unchanged in HEC-1-A WT, *ADORA1* KO, and *ADORA2B* KO cells, but decreased in  
149 *NT5E* KO cells. **(B-C)** Independent replicates for data shown in Figure 6D. TCF/LEF  
150 reporter activity in cells transfected with empty vector (EV) or patient-specific  $\beta$ -catenin  
151 mutants D32N, G34R, or S37F. Each dot represents one technical replicate. Data  
152 represent mean  $\pm$  SEM. \*P < 0.05, \*\*P < 0.01; 2-way ANOVA with Dunnett's post test.

153

154

155

156

157

158

159

160

161

162

163

164

165

**Figure S6**

**A**

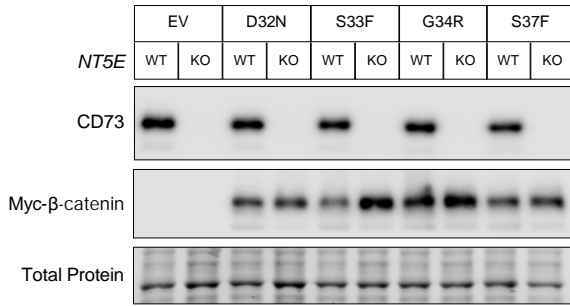

**B**

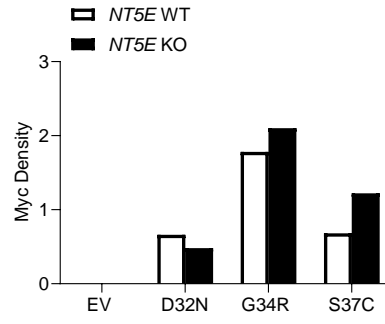

**C**

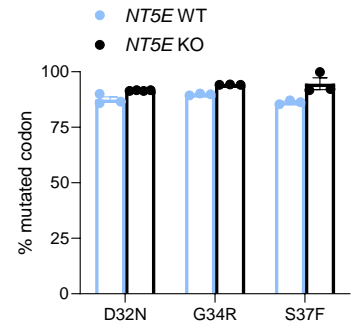

**D**

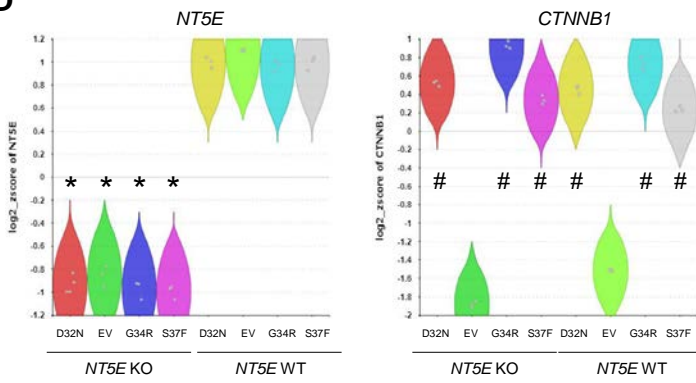

**E**

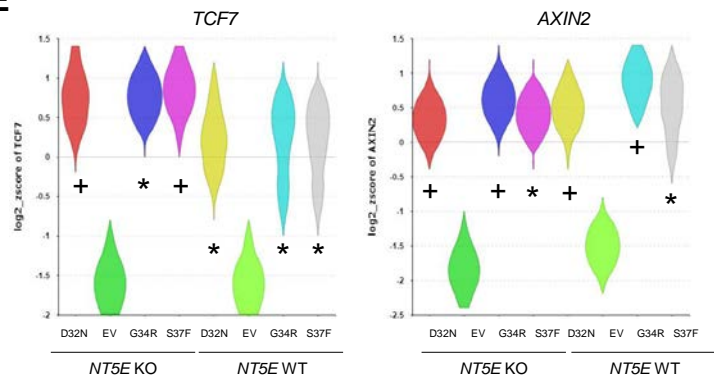

\*P < 0.001 vs. *NT5E* WT  
 #P < 0.0005 vs EV

\*P < 0.05 vs. EV  
 +P < 0.005 vs. EV

166 **Supplemental Figure 6. Validation of patient-specific  $\beta$ -catenin mutant expression**  
167 **and activity in RNA-seq samples. (A)** Protein samples were collected in sync with  
168 samples process and submitted for RNA-sequencing. Immunoblots were used to  
169 assess equal or near equal expression of each patient-specific  $\beta$ -catenin mutant  
170 between *NT5E* WT and *NT5E* KO HEC-1-A cells. Due to unequal protein expression of  
171 S33F between *NT5E* WT and *NT5E* KO samples, RNA from these samples was not  
172 submitted for sequencing. **(B)** Densitometry for myc- $\beta$ -catenin from samples in **(A)** used  
173 for RNA-sequencing. **(C)** Mutation frequencies for D32N, G34R, and S37F, calculated  
174 using Integrative Genomics Viewer<sup>56</sup>. **(D-E)** Validation of our experimental system using  
175 mRNA expression levels from RNA-seq data. **(D)** As expected, *NT5E* levels were low in  
176 *NT5E* KO samples and *CTNNB1* expression increased in both *NT5E* KO and *NT5E* WT  
177 samples expressing patient-specific  $\beta$ -catenin mutants. **(E)** Validation of  $\beta$ -catenin  
178 mutants to induce Wnt/ $\beta$ -catenin signaling gene targets, *TCF7* and *AXIN2*, is shown.

179

180

181

182

183

184

185

186

**Figure S7**

**A**

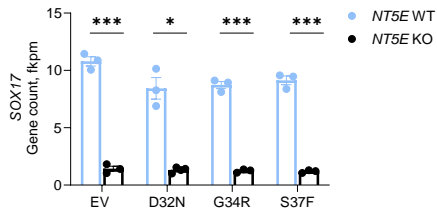

**B**

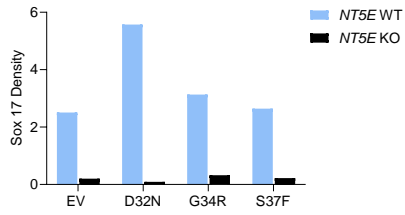

**C**

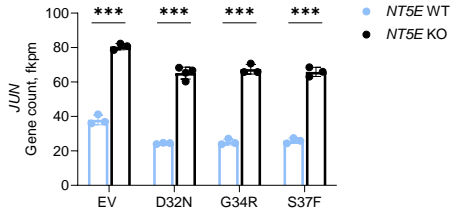

**D**

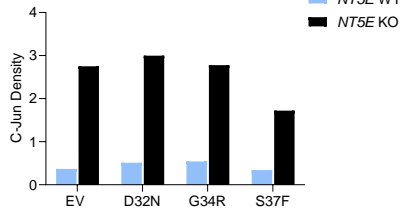

**E**

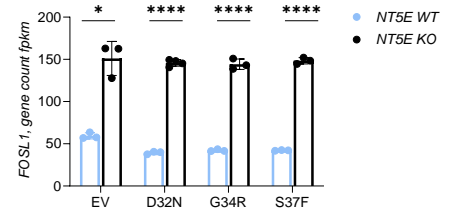

**F**

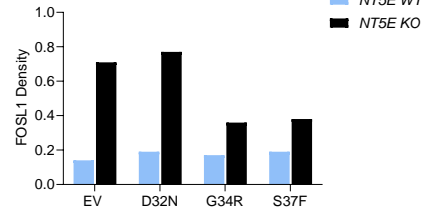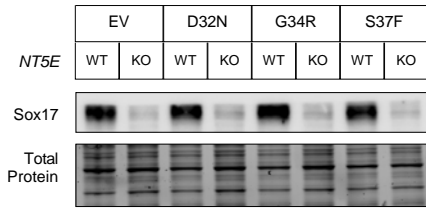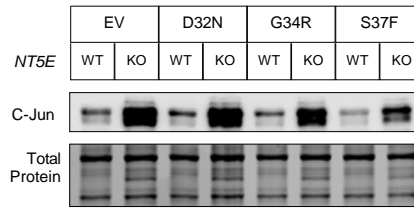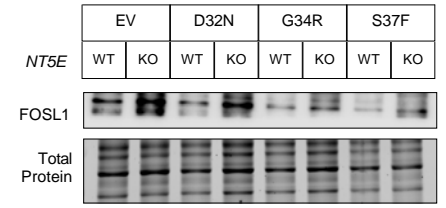

187 **Supplemental Figure 7. Validation of dysregulated genes in *NT5E* WT and *NT5E***  
188 **KO HEC-1-A cells identified from RNA-seq studies. (A)** mRNA expression and **(B)**  
189 protein expression of Sox17 in *NT5E* WT and *NT5E* KO cells. **(C)** mRNA expression  
190 and **(D)** protein expression of C-Jun in *NT5E* WT and KO cells. **(E)** mRNA expression  
191 and **(F)** protein expression of Fra1 in *NT5E* WT and KO cells. **(B, D, F)** Representative  
192 immunoblots for  $n = 3$  independent experiments. \* $P < 0.05$ , \*\* $P < 0.01$ , \*\*\* $P < 0.005$ ,  
193 Welch t-test.

194

195

196

197

198

199

200

201

202

203

204

205

206



207 **Supplemental References**

- 208 1. Doumpas, N., Lampart, F., Robinson, M.D., Lentini, A., Nestor, C.E., Cantù, C., and Basler, K.  
209 (2019). TCF/LEF dependent and independent transcriptional regulation of Wnt/ $\beta$ -catenin  
210 target genes. *EMBO J.* *38*, e98873. <https://doi.org/10.15252/embj.201798873>.
- 211 2. Taghehchian, N., Farshchian, M., Mahmoudian, R.A., Asoodeh, A., and Abbaszadegan, M.R.  
212 (2022). The expression of long non-coding RNA *LINC01389*, *LINC00365*, *RP11-138J23.1*,  
213 and *RP11-354K4.2* in gastric cancer and their impacts on EMT. *Mol. Cell. Probes* *66*,  
214 101869. <https://doi.org/10.1016/j.mcp.2022.101869>.
- 215 3. Mitra, R., Adams, C.M., and Eischen, C.M. Systematic lncRNA mapping to genome-wide co-  
216 essential modules uncovers cancer dependency on uncharacterized lncRNAs. *eLife* *11*,  
217 e77357. <https://doi.org/10.7554/eLife.77357>.
- 218 4. Zeng, H., Xu, Y., Xu, S., Jin, L., Shen, Y., Rajan, K.C., Bhandari, A., and Xia, E. (2021).  
219 Construction and Analysis of a Colorectal Cancer Prognostic Model Based on N6-  
220 Methyladenosine-Related lncRNAs. *Front. Cell Dev. Biol.* *9*, 698388.  
221 <https://doi.org/10.3389/fcell.2021.698388>.
- 222 5. Liu, H., Zhang, M., Zhang, T., Shi, M., Lu, W., Yang, S., Cui, Q., and Li, Z. (2021). Identification  
223 of a ferroptosis-related lncRNA signature with prognosis for Wilms tumor. *Transl. Pediatr.*  
224 *10*, 2418–2431. <https://doi.org/10.21037/tp-21-211>.
- 225 6. Tang, C., Qu, G., Xu, Y., Yang, G., Wang, J., and Xiang, M. (2021). An immune-related lncRNA  
226 risk coefficient model to predict the outcomes in clear cell renal cell carcinoma. *Aging* *13*,  
227 26046–26062. <https://doi.org/10.18632/aging.203797>.
- 228 7. Li, X., Jin, Y., Huang, J., Feng, C., Chen, X., Zuo, L., Liu, G., Chen, F., Fan, J., and Fang, L. (2024).  
229 Lnc00113 promotes triple-negative breast cancer progression via the NOB-1/MAPK  
230 signaling axis. *J. Gene Med.* *26*, e3662. <https://doi.org/10.1002/jgm.3662>.
- 231 8. Yang, Z., Li, H., Wang, Z., Yang, Y., Niu, J., Liu, Y., Sun, Z., and Yin, C. (2018). Microarray  
232 expression profile of long non-coding RNAs in human lung adenocarcinoma. *Thorac. Cancer*  
233 *9*, 1312–1322. <https://doi.org/10.1111/1759-7714.12845>.
- 234 9. Tian, Z.-H., Yuan, C., Yang, K., and Gao, X.-L. (2019). Systematic identification of key genes  
235 and pathways in clear cell renal cell carcinoma on bioinformatics analysis. *Ann. Transl. Med.*  
236 *7*, 89–89. <https://doi.org/10.21037/atm.2019.01.18>.
- 237 10. Li, C., Yao, W., Zhao, C., Yang, G., Wei, J., Qi, Y., Huang, R., Zhao, Q., and Hao, C. (2020).  
238 Comprehensive Analysis of lncRNAs Related to the Prognosis of Esophageal Cancer Based  
239 on ceRNA Network and Cox Regression Model. *BioMed Res. Int.* *2020*, 3075729.  
240 <https://doi.org/10.1155/2020/3075729>.
- 241 11. Gil-Kulik, P., Petniak, A., Kluz, N., Wallner, G., Skoczylas, T., Ciechański, A., and Kocki, J.  
242 (2023). Influence of Clinical Factors on miR-3613-3p Expression in Colorectal Cancer. *Int. J.*  
243 *Mol. Sci.* *24*, 14023. <https://doi.org/10.3390/ijms241814023>.

- 244 12. Chen, C., Pan, Y., Bai, L., Chen, H., Duan, Z., Si, Q., Zhu, R., Chuang, T.-H., and Luo, Y. (2021).  
245 MicroRNA-3613-3p functions as a tumor suppressor and represents a novel therapeutic  
246 target in breast cancer. *Breast Cancer Res. BCR* *23*, 12. [https://doi.org/10.1186/s13058-021-](https://doi.org/10.1186/s13058-021-01389-9)  
247 01389-9.
- 248 13. Wang, D., Jiao, Z., Ji, Y., and Zhang, S. (2020). Elevated TUBA1A Might Indicate the Clinical  
249 Outcomes of Patients with Gastric Cancer, Being Associated with the Infiltration of  
250 Macrophages in the Tumor Immune Microenvironment. *J. Gastrointest. Liver Dis.* *29*, 509–  
251 522. <https://doi.org/10.15403/jgld-2834>.
- 252 14. Wen, J., Wang, Q., Zhang, W., and Wang, W. (2023). TUBA1A licenses APC/C-mediated  
253 mitotic progression to drive glioblastoma growth by inhibiting PLK3. *FEBS Lett.* *597*, 3072–  
254 3086. <https://doi.org/10.1002/1873-3468.14764>.
- 255 15. de Freitas, G.B., Penteado, L., Miranda, M.M., Filassi, J.R., Baracat, E.C., and Linhares, I.M.  
256 (2022). The circulating 70 kDa heat shock protein (HSPA1A) level is a potential biomarker  
257 for breast carcinoma and its progression. *Sci. Rep.* *12*, 13012.  
258 <https://doi.org/10.1038/s41598-022-17414-6>.
- 259 16. Guan, Y., Zhu, X., Liang, J., Wei, M., Huang, S., and Pan, X. (2021). Upregulation of  
260 HSPA1A/HSPA1B/HSPA7 and Downregulation of HSPA9 Were Related to Poor Survival in  
261 Colon Cancer. *Front. Oncol.* *11*, 749673. <https://doi.org/10.3389/fonc.2021.749673>.
- 262 17. Palangat, M., Anastasakis, D.G., Fei, D.L., Lindblad, K.E., Bradley, R., Hourigan, C.S., Hafner,  
263 M., and Larson, D.R. (2019). The splicing factor U2AF1 contributes to cancer progression  
264 through a noncanonical role in translation regulation. *Genes Dev.* *33*, 482–497.  
265 <https://doi.org/10.1101/gad.319590.118>.
- 266 18. Zhu, Y., Song, D., Guo, J., Jin, J., Tao, Y., Zhang, Z., Xu, F., He, Q., Li, X., Chang, C., et al. (2021).  
267 U2AF1 mutation promotes tumorigenicity through facilitating autophagy flux mediated by  
268 FOXO3a activation in myelodysplastic syndromes. *Cell Death Dis.* *12*, 655.  
269 <https://doi.org/10.1038/s41419-021-03573-3>.
- 270 19. Chen, X., Zhang, Y., Chen, S., Yang, Y., Sun, G., and Pan, P. (2024). Construction of a  
271 nomogram for predicting HNSCC distant metastasis and identification of EIF5A as a hub  
272 gene. *Sci. Rep.* *14*, 13367. <https://doi.org/10.1038/s41598-024-64197-z>.
- 273 20. Chen, S., Li, X., Zhang, J., Li, L., Wang, X., Zhu, Y., Guo, L., and Wang, J. (2021). Six mutator-  
274 derived lncRNA signature of genome instability for predicting the clinical outcome of colon  
275 cancer. *J. Gastrointest. Oncol.* *12*, 2157–2171. <https://doi.org/10.21037/jgo-21-494>.
- 276 21. Wan, J., Guo, C., Fang, H., Xu, Z., Hu, Y., and Luo, Y. (2021). Autophagy-Related Long Non-  
277 coding RNA Is a Prognostic Indicator for Bladder Cancer. *Front. Oncol.* *11*, 647236.  
278 <https://doi.org/10.3389/fonc.2021.647236>.
- 279 22. Zhang, Y., Yue, Q., Cao, F., Li, Y., and Wei, Y. (2022). Necroptosis-related lncRNA signatures  
280 determine prognosis in breast cancer patients. *Sci. Rep.* *12*, 11268.  
281 <https://doi.org/10.1038/s41598-022-15209-3>.

- 282 23. Tan, W., Yuan, Y., Huang, H., Ma, J., Li, Y., Gou, Y., Wu, H., and Hu, Z. (2022). Comprehensive  
283 analysis of autophagy related long non-coding RNAs in prognosis, immunity, and treatment  
284 of muscular invasive bladder cancer. *Sci. Rep.* *12*, 11242. <https://doi.org/10.1038/s41598-022-13952-1>.  
285
- 286 24. Cedro-Tanda, A., Ríos-Romero, M., Romero-Córdoba, S., Cisneros-Villanueva, M., Rebollar-  
287 Vega, R.G., Alfaro-Ruiz, L.A., Jiménez-Morales, S., Domínguez-Reyes, C., Villegas-Carlos, F.,  
288 Tenorio-Torres, A., et al. (2020). A lncRNA landscape in breast cancer reveals a potential role  
289 for AC009283.1 in proliferation and apoptosis in HER2-enriched subtype. *Sci. Rep.* *10*,  
290 13146. <https://doi.org/10.1038/s41598-020-69905-z>.
- 291 25. Klonisch, T., Logue, S.E., Hombach-Klonisch, S., and Vriend, J. (2023). DUBing Primary  
292 Tumors of the Central Nervous System: Regulatory Roles of Deubiquitinases. *Biomolecules*  
293 *13*, 1503. <https://doi.org/10.3390/biom13101503>.
- 294 26. An angiogenesis-related long noncoding RNA signature correlates with prognosis in  
295 patients with hepatocellular carcinoma (2021). *Biosci. Rep.* *41*.  
296 <https://doi.org/10.1042/BSR20204442>.
- 297 27. Hong, W.-F., Gu, Y.-J., Wang, N., Xia, J., Zhou, H.-Y., Zhan, K., Cheng, M.-X., and Cai, Y. (2021).  
298 Integrative Characterization of Immune-relevant Genes in Hepatocellular Carcinoma. *J. Clin.*  
299 *Transl. Hepatol.* *9*, 301–314. <https://doi.org/10.14218/JCTH.2020.00132>.
- 300 28. Wei, C., Liang, Q., Li, X., Li, H., Liu, Y., Huang, X., Chen, X., Guo, Y., and Li, J. (2019).  
301 Bioinformatics profiling utilized a nine immune-related long noncoding RNA signature as a  
302 prognostic target for pancreatic cancer. *J. Cell. Biochem.* *120*, 14916–14927.  
303 <https://doi.org/10.1002/jcb.28754>.
- 304 29. Huang, S., Wang, X., Zhu, Y., Wang, Y., Chen, J., and Zheng, H. (2023). SOX2 promotes  
305 vasculogenic mimicry by accelerating glycolysis via the lncRNA AC005392.2-GLUT1 axis in  
306 colorectal cancer. *Cell Death Dis.* *14*, 791. <https://doi.org/10.1038/s41419-023-06274-1>.
- 307 30. Yu, P., Lan, H., Song, X., and Pan, Z. (2020). High Expression of the SH3TC2-DT/SH3TC2  
308 Gene Pair Associated With FLT3 Mutation and Poor Survival in Acute Myeloid Leukemia: An  
309 Integrated TCGA Analysis. *Front. Oncol.* *10*. <https://doi.org/10.3389/fonc.2020.00829>.
- 310 31. Ren, L., Yang, X., Liu, J., Wang, W., Liu, Z., Lin, Q., Huang, B., Pan, J., and Mao, X. (2023). An  
311 innovative model based on N7-methylguanosine-related lncRNAs for forecasting prognosis  
312 and tumor immune landscape in bladder cancer. *Cancer Cell Int.* *23*, 85.  
313 <https://doi.org/10.1186/s12935-023-02933-7>.
- 314 32. Tian, J., Fu, C., Zeng, X., Fan, X., and Wu, Y. (2022). An Independent Prognostic Model Based  
315 on Ten Autophagy-Related Long Noncoding RNAs in Pancreatic Cancer Patients. *Genet.*  
316 *Res.* *2022*, 3895396. <https://doi.org/10.1155/2022/3895396>.
- 317 33. Chen, G., Yang, G., Long, J., Yang, J., Qin, C., Luo, W., Qiu, J., Zhao, F., You, L., Zhang, T., et al.  
318 (2021). Comprehensive Analysis of Autophagy-Associated lncRNAs Reveal Potential  
319 Prognostic Prediction in Pancreatic Cancer. *Front. Oncol.* *11*, 596573.  
320 <https://doi.org/10.3389/fonc.2021.596573>.

- 321 34. Zhou, Y., Wang, L., Zhang, W., Ma, J., Zhang, Z., Yang, M., Yu, J., Luo, J., and Yan, Z. (2022).  
322 Identification of Epithelial Mesenchymal Transition-Related lncRNAs Associated with  
323 Prognosis and Tumor Immune Microenvironment of Hepatocellular Carcinoma. *Dis. Markers*  
324 *2022*, 6335155. <https://doi.org/10.1155/2022/6335155>.
- 325 35. Yao, Y., Hua, Q., and Zhou, Y. (2019). CircRNA has\_circ\_0006427 suppresses the progression  
326 of lung adenocarcinoma by regulating miR-6783-3p/DKK1 axis and inactivating Wnt/ $\beta$ -  
327 catenin signaling pathway. *Biochem. Biophys. Res. Commun.* *508*, 37–45.  
328 <https://doi.org/10.1016/j.bbrc.2018.11.079>.
- 329 36. Di, Z., Xu, G., Ding, Z., Li, C., Song, J., Huang, G., Zheng, J., Zhang, X., and Xiong, B. (2023).  
330 Identification and validation of a novel prognosis model based on m5C-related long non-  
331 coding RNAs in colorectal cancer. *Cancer Cell Int.* *23*, 196. <https://doi.org/10.1186/s12935-023-03025-2>.
- 333 37. Kong, Q., Shu, N., Li, J., and Xu, N. (2018). miR-641 Functions as a Tumor Suppressor by  
334 Targeting MDM2 in Human Lung Cancer. *Oncol. Res.* *26*, 735–741.  
335 <https://doi.org/10.3727/096504017X15021536183490>.
- 336 38. Zhu, Y., Liu, B., Zhang, P., Zhang, J., and Wang, L. (2019). LncRNA TUSC8 inhibits the invasion  
337 and migration of cervical cancer cells via miR-641/PTEN axis. *Cell Biol. Int.* *43*, 781–788.  
338 <https://doi.org/10.1002/cbin.11152>.
- 339 39. Zhang, Y., Cai, H., Wu, M.-H., Zhu, D.-H., Wang, X.-Y., Chen, Z.-Y., Yang, L., Liu, P., and Liu, Z.  
340 (2023). miR-3682-3p Activated by c-Myc Aggravates the Migration and Stemness in  
341 Hepatocellular Carcinoma Cells by Regulating PTEN/PI3K/AKT/ $\beta$ -Catenin Signaling. *Dig.*  
342 *Dis.* *41*, 447–457. <https://doi.org/10.1159/000527800>.
- 343 40. Tsaplina, N.N., Porkhanova, N.V., Fatkina, N.B., Zinkovich, M.S., Gusareva, M.A., Solntseva,  
344 A.A., Vasilieva, E.O., Kosheleva, N.G., Tolmacheva, E.A., Martynova, K.V., et al. (2022). From  
345 bioinformatic screening to low-invasive molecular diagnostics of the cervical tumor  
346 sensitivity to radiation therapy. *J. Clin. Oncol.* *40*, e17512–e17512.  
347 [https://doi.org/10.1200/JCO.2022.40.16\\_suppl.e17512](https://doi.org/10.1200/JCO.2022.40.16_suppl.e17512).
- 348 41. Zhang, H., Bai, L., Wu, X.-Q., Tian, X., Feng, J., Wu, X., Shi, G.-H., Pei, X., Lyu, J., Yang, G., et al.  
349 (2023). Proteogenomics of clear cell renal cell carcinoma response to tyrosine kinase  
350 inhibitor. *Nat. Commun.* *14*, 4274. <https://doi.org/10.1038/s41467-023-39981-6>.
- 351 42. Kasera, H., Shekhawat, R.S., Yadav, P., and Singh, P. (2023). Gene expression profiling and  
352 protein–protein network analysis revealed prognostic hub biomarkers linking cancer risk in  
353 type 2 diabetic patients. *Sci. Rep.* *13*, 22605. <https://doi.org/10.1038/s41598-023-49715-9>.
- 354 43. Amaya, C., Kurisetty, V., Stiles, J., Nyakeriga, A.M., Arumugam, A., Lakshmanaswamy, R.,  
355 Botez, C.E., Mitchell, D.C., and Bryan, B.A. (2014). A genomics approach to identify  
356 susceptibilities of breast cancer cells to “fever-range” hyperthermia. *BMC Cancer* *14*, 81.  
357 <https://doi.org/10.1186/1471-2407-14-81>.
- 358 44. Khare, S.P., Sharma, A., Deodhar, K.K., and Gupta, S. (2011). Overexpression of histone  
359 variant H2A.1 and cellular transformation are related in N-nitrosodiethylamine-induced

- 360 sequential hepatocarcinogenesis. *Exp. Biol. Med.* Maywood NJ *236*, 30–35.  
361 <https://doi.org/10.1258/ebm.2010.010140>.
- 362 45. Mamoor, S. (2020). HIST2H2AA3 is differentially expressed in the lymph node and brain  
363 metastases of patients with metastatic breast cancer. Preprint at OSF,  
364 <https://doi.org/10.31219/osf.io/sr769> <https://doi.org/10.31219/osf.io/sr769>.
- 365 46. Yan, S., Wang, Y., Gu, Y., Zhou, M., Su, L., Yin, T., Zhang, W., and Yue, Y. (2023). Baicalin  
366 suppresses colorectal cancer cell proliferation, potentially via ARRDC4: Bioinformatics and  
367 experimental analysis. *Arab. J. Chem.* *16*, 105141.  
368 <https://doi.org/10.1016/j.arabjc.2023.105141>.
- 369 47. He, C.-M., Zhang, X.-D., Zhu, S.-X., Zheng, J.-J., Wang, Y.-M., Wang, Q., Yin, H., Fu, Y.-J., Xue, S.,  
370 Tang, J., et al. (2022). Integrative pan-cancer analysis and clinical characterization of the  
371 N7-methylguanosine (m7G) RNA modification regulators in human cancers. *Front. Genet.*  
372 *13*. <https://doi.org/10.3389/fgene.2022.998147>.
- 373 48. Zhao, S., Dong, X., Ni, X., Li, L., Lu, X., Zhang, K., and Gao, Y. (2021). Exploration of a Novel  
374 Prognostic Risk Signature and Its Effect on the Immune Response in Nasopharyngeal  
375 Carcinoma. *Front. Oncol.* *11*. <https://doi.org/10.3389/fonc.2021.709931>.
- 376 49. Zhang, P., Ma, K., Ke, X., Liu, L., Li, Y., Liu, Y., and Wang, Y. (2021). Development and Validation  
377 of a Five-RNA–Based Signature and Identification of Candidate Drugs for Neuroblastoma.  
378 *Front. Genet.* *12*. <https://doi.org/10.3389/fgene.2021.685646>.
- 379 50. Dong, S., Li, W., Wang, L., Hu, J., Song, Y., Zhang, B., Ren, X., Ji, S., Li, J., Xu, P., et al. (2019).  
380 Histone-Related Genes Are Hypermethylated in Lung Cancer and Hypermethylated  
381 HIST1H4F Could Serve as a Pan-Cancer Biomarker. *Cancer Res.* *79*, 6101–6112.  
382 <https://doi.org/10.1158/0008-5472.CAN-19-1019>.
- 383 51. Alessandrini, F., Pezzè, L., Menendez, D., Resnick, M.A., and Ciribilli, Y. (2018). ETV7-  
384 Mediated DNAJC15 Repression Leads to Doxorubicin Resistance in Breast Cancer Cells.  
385 *Neoplasia* *20*, 857–870. <https://doi.org/10.1016/j.neo.2018.06.008>.
- 386 52. Chai, B., Li, Y., Guo, Y., Zhang, Z., Jia, K., Chai, X., and Suo, Y. (2024). ETV7 promotes  
387 colorectal cancer progression through upregulation of IFIT3. *Funct. Integr. Genomics* *24*, 8.  
388 <https://doi.org/10.1007/s10142-023-01282-y>.
- 389 53. Li, H., Zhang, Y., and Zheng, S. (2021). Comprehensive Analysis Identified ETV7 as a  
390 Potential Prognostic Biomarker in Bladder Cancer. *BioMed Res. Int.* *2021*, 8530186.  
391 <https://doi.org/10.1155/2021/8530186>.
- 392 54. Meškytė, E.M., Pezzè, L., Bartolomei, L., Forcato, M., Bocci, I.A., Bertalot, G., Barbareschi, M.,  
393 Oliveira-Ferrer, L., Bisio, A., Biciato, S., et al. (2023). ETV7 reduces inflammatory responses  
394 in breast cancer cells by repressing the TNFR1/NF-κB axis. *Cell Death Dis.* *14*, 1–16.  
395 <https://doi.org/10.1038/s41419-023-05718-y>.
- 396 55. Rodig, S.J., Kutok, J.L., Paterson, J.C., Nitta, H., Zhang, W., Chapuy, B., Tumwine, L.K.,  
397 Montes-Moreno, S., Agostinelli, C., Johnson, N.A., et al. (2010). The pre-B-cell receptor  
398 associated protein VpreB3 is a useful diagnostic marker for identifying c-MYC translocated

- 399 lymphomas. *Haematologica* *95*, 2056–2062.  
400 <https://doi.org/10.3324/haematol.2010.025767>.
- 401 56. Robinson, J.T., Thorvaldsdóttir, H., Winckler, W., Guttman, M., Lander, E.S., Getz, G., and  
402 Mesirov, J.P. (2011). Integrative Genomics Viewer. *Nat. Biotechnol.* *29*, 24.  
403 <https://doi.org/10.1038/nbt.1754>.
- 404
